# Supplementary material
Source: Springer Nature journal article supplement (https://www.springermedizin.de/resource/supplementary/13024_2013_521_MOESM14_ESM.pdf/9644394)

**A**

Distance climbed after 4 sec. (cm)

Geotaxis (2 copies)

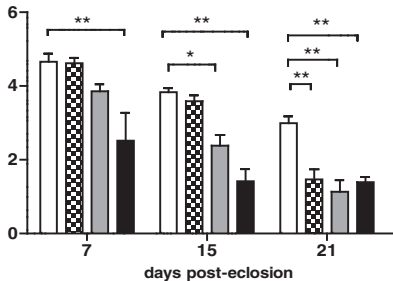**B**

Response to light (%)

Phototaxis (1 copy)

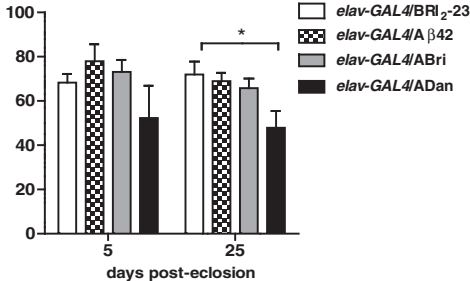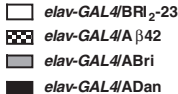

Supplement: MOESM14 [file 9644394]
